# Supplementary material for: Microwave-assisted synthesis of difficult sequence-containing peptides using the isopeptide method
Source: Royal Society of Chemistry journal article supplement (doi:10.1039/c3ob00030c), 2013-01-01
Supplement: c3ob00030c.pdf [file c3ob00030c.pdf]

# Supporting Information

## Microwave-Assisted Synthesis of Difficult Sequence Containing Peptide Using Isopeptide Method.

Waleed M. Hussein<sup>a</sup>, Tzu-Yu Liu<sup>a</sup>, Istvan Toth<sup>a,b,\*</sup>, Mariusz Skwarczynski<sup>a,\*</sup>

<sup>a</sup>The University of Queensland, School of Chemistry and Molecular Biosciences, Brisbane, QLD 4072, Australia

<sup>b</sup>The University of Queensland, School of Pharmacy, Brisbane, QLD 4072, Australia.

**Corresponding Authors:**

Istvan Toth  
School of Chemistry and Molecular Biosciences  
The University of Queensland  
St Lucia, QLD 4072  
Australia  
Phone +61 7 33469892  
Fax: +61 7 33654273  
e-mail: i.toth@uq.edu.au

Mariusz Skwarczynski  
School of Chemistry and Molecular Biosciences  
The University of Queensland  
St Lucia, QLD 4072  
Australia  
Phone +61 7 33469894  
Fax: +61 7 33654273  
e-mail: m.skwarczynski@uq.edu.au

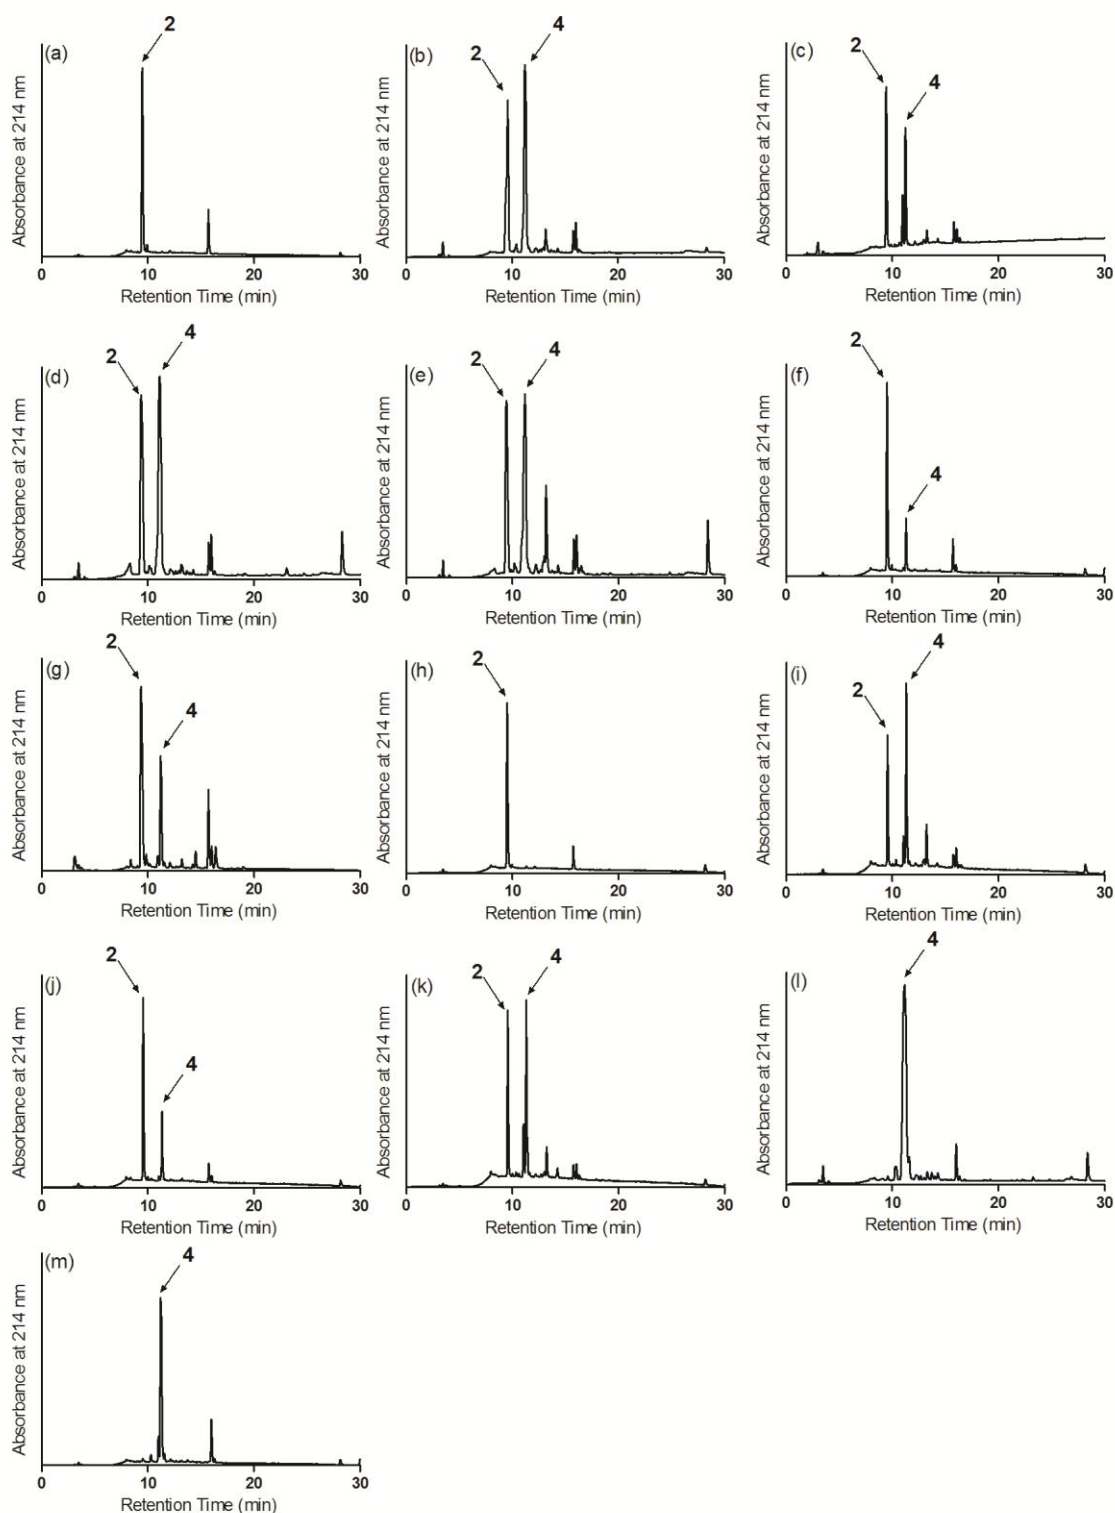

**Figure S1.** HPLC traces of crude product **4** obtained after coupling the isodipeptide unit (**1**) to peptide **2** on the resin under different coupling conditions. (a) The first 6 amino acids (**2**) synthesized by the microwave. HPLC signal of **2** was used as a reference to calculate the efficiency of the isodipeptide unit coupling. Coupling conditions of isodipeptide unit: (b) HATU/DIPEA at 50 °C (2 x 15 min); (c) HATU/DIPEA at RT (3 min) and at 50 °C (2 x 15 min); (d) HATU/DIPEA at 70 °C (2 x 10 min); (e) HATU/DIPEA at 70 °C (2 x 20 min); (f)

DIC/HOBT at 50 °C (2 x 15 min); (g) DIC/HOBT at 70 °C (2 x 10 min); (h) EEDQ at 70 °C (2 x 10 min); (i) PyBOP/DIPEA at 70 °C (2 x 10 min); (j) EDC/HOBT at 70 °C (2 x 10 min); (k) HBTU/HOBT/ DIPEA at 70 °C (2 x 10 min); (l) HATU/DIPEA at RT (2 x 2 h); (m) HATU/DIPEA at RT (1 x 30 min).

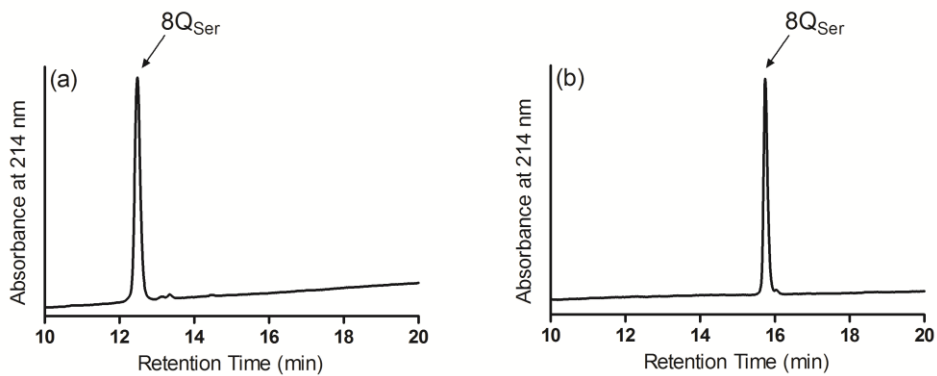

**Figure S2.** HPLC analysis of purified 8Q<sub>Ser</sub> carried out on (a) C4 column, purity > 98% and (b) C18 column, purity > 98%.

**Table S1.** Effect of 20% piperidine at 70 °C on the ester bond of the isodipeptide unit.

| number of cycles <sup>a</sup> | HPLC Yield <sup>b</sup> of<br>isopeptide <b>4</b><br>(%) |
|-------------------------------|----------------------------------------------------------|
| 1                             | 72                                                       |
| 5                             | 62                                                       |
| 10                            | 57                                                       |
| 20                            | 51                                                       |

<sup>a</sup> One cycle is (1 x 2.5 min and 1 x 5 min) at 70 °C.

<sup>b</sup> HPLC Yield calculated based on the integration of the analytical HPLC signals.

**Table S2.** Comparison of the purity of the crude iso-8Q<sub>Ser</sub> synthesized by using different methods.

| method | conditions for the synthesis of iso-8Q <sub>Ser</sub>                                                                     | HPLC<br>Yield <sup>a</sup><br>(%) |
|--------|---------------------------------------------------------------------------------------------------------------------------|-----------------------------------|
| B      | isopeptide method at RT                                                                                                   | 70                                |
| C      | isopeptide method under microwave irradiation and 20% piperidine (1 x 2.5 min and 1 x 5 min at 70 °C) for removal of Fmoc | 46                                |
| D      | isopeptide method under microwave irradiation and 20% piperidine (1 x 1 min and 2 x 5 min at RT) for removal of Fmoc      | 71                                |

<sup>a</sup> Yield calculated based on the integration of the analytical HPLC signals

**Table S3.** Comparison of the purity of the crude 8Q<sub>Ser</sub> synthesized by using different methods.

| method | conditions for the synthesis of 8Q <sub>Ser</sub>                                                                         | HPLC<br>Yield <sup>a</sup><br>(%) |
|--------|---------------------------------------------------------------------------------------------------------------------------|-----------------------------------|
| A      | standard SPPS at RT                                                                                                       | 43                                |
| B      | isopeptide method at RT                                                                                                   | 73                                |
| C      | isopeptide method under microwave irradiation and 20% piperidine (1 x 2.5 min and 1 x 5 min at 70 °C) for removal of Fmoc | 53                                |
| D      | isopeptide method under microwave irradiation and 20% piperidine (1 x 1 min and 2 x 5 min at RT) for removal of Fmoc      | 73                                |

<sup>a</sup> Yield calculated based on the integration of the analytical HPLC signals
